# Supplementary material for: Recruitment of CXCR4+ type 1 innate lymphoid cells distinguishes sarcoidosis from other skin granulomatous diseases
Source: PubMed Central journal article supplement (PMC11364400; doi:10.1172/jci178711), 2024-09-03
Supplement: jci-134-178711-s157.pdf [file jci-134-178711-s157.pdf]

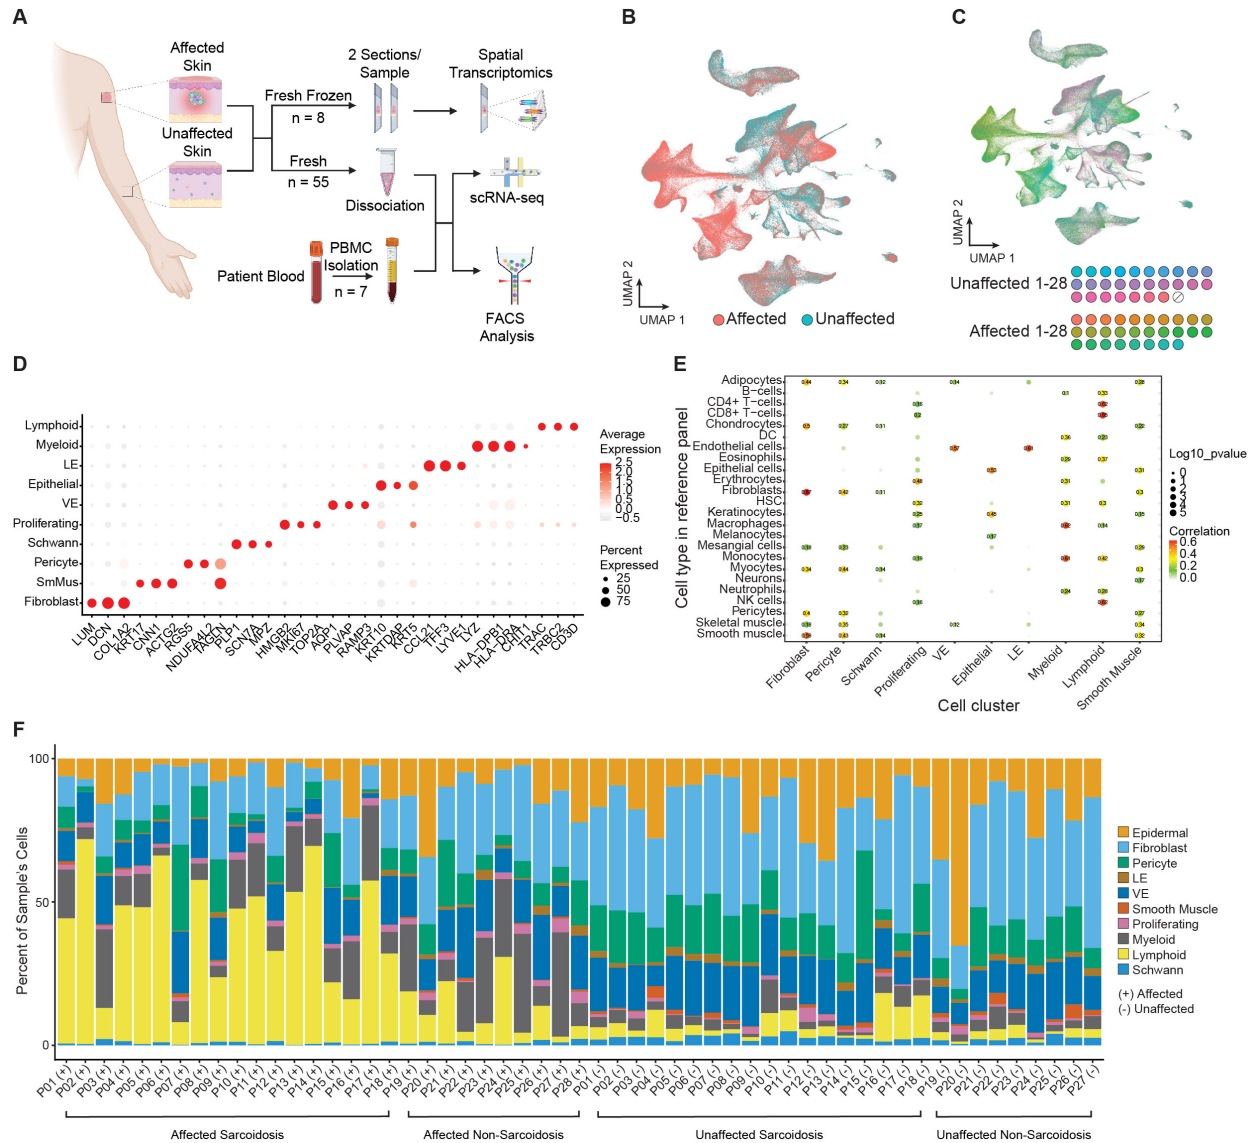

**Figure S1: Single-cell analysis of human skin granulomas.**

(A) Summary of analysis strategy. (B-C) UMAP plots of unaffected and affected skin granuloma samples (N=55). Individual patient samples are depicted in C. (D) Dot plot of key marker genes for each cell type. Color scale represents gene expression, and dot size represents percentage of cells expressing the marker gene. (E) deCS correlation plot for cell type enrichment analysis of different cell clusters. Y-axis: main cell types identified from BlueprintEncode database. Color scale represents Pearson correlation coefficient, and dot sizes represent the  $-\log_{10}$  transformed p value. (F) Bar plot showing relative contribution of different cell types in individual skin samples. VE, Vascular endothelium; LE, lymphatic endothelium; VSMC, vascular smooth muscle cells.

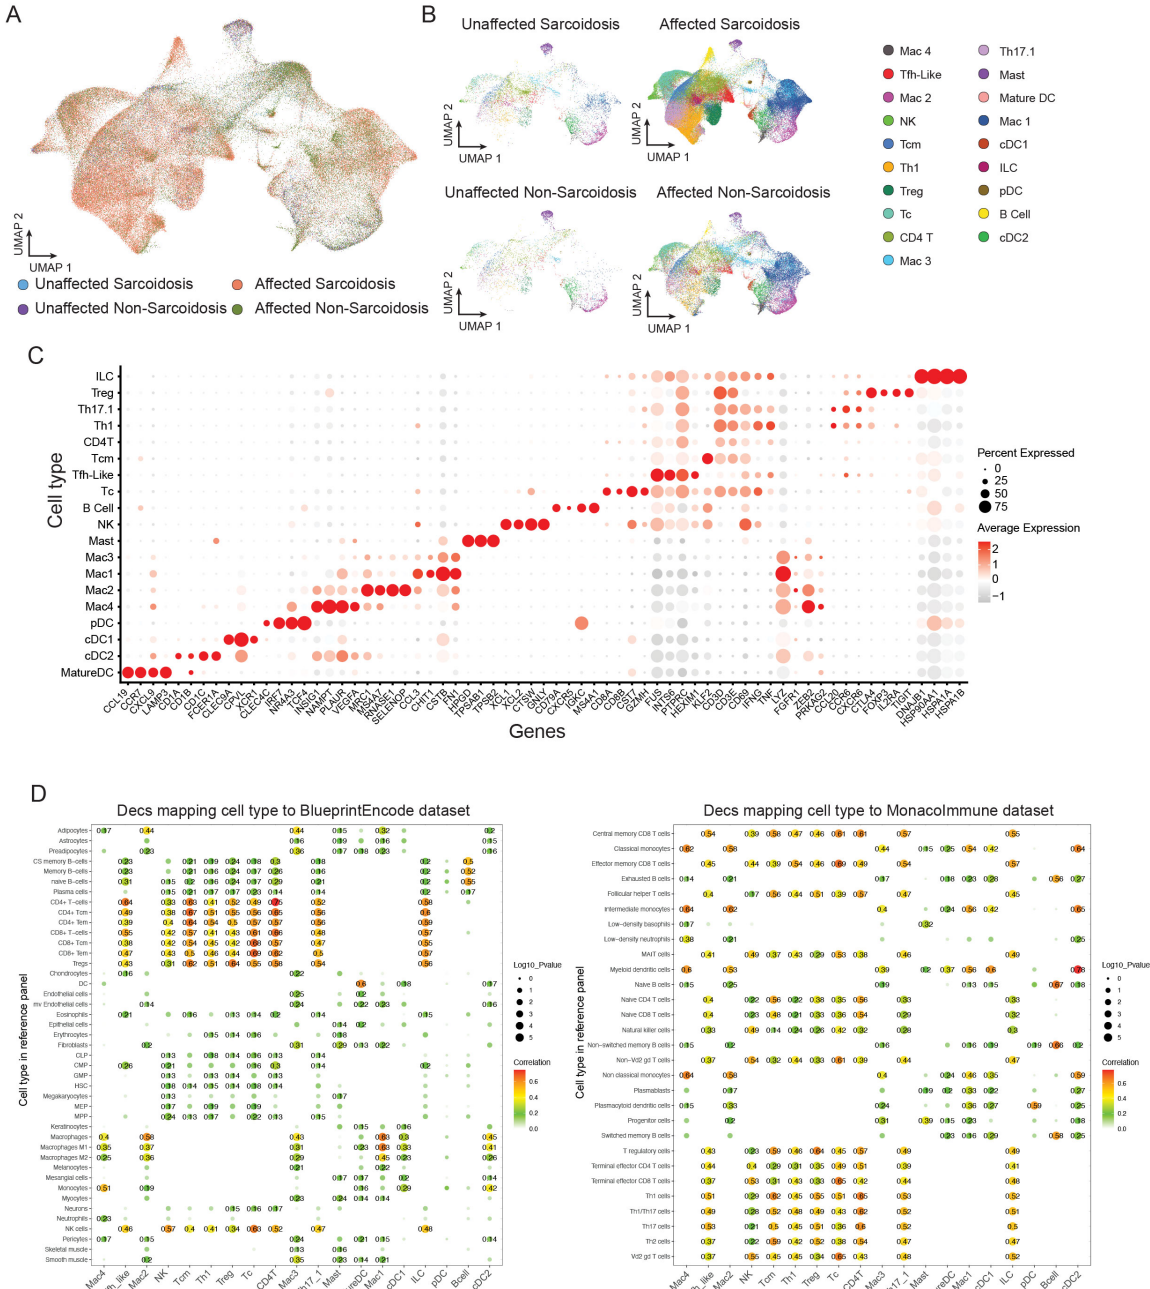

**Figure S2: Immune cell landscape of skin granulomas.**

(A-B) UMAP plot of immune subcluster in unaffected and affected skin granuloma samples demonstrating tight clustering (N=55). (B) Different immune cell identities are plotted for individual conditions. (C) Dot plot of key marker genes for each cell type. Color scale represents gene expression, and dot size represents percentage of cells expressing the marker gene. (D) deCS correlation plot for cell type enrichment analysis of different cell clusters. Y-axis: main cell types identified by BlueprintEncode (left) and MonacoImmune (right) databases. Color scale represents Pearson correlation coefficient, and dot sizes represent the  $-\log_{10}$  transformed p value.

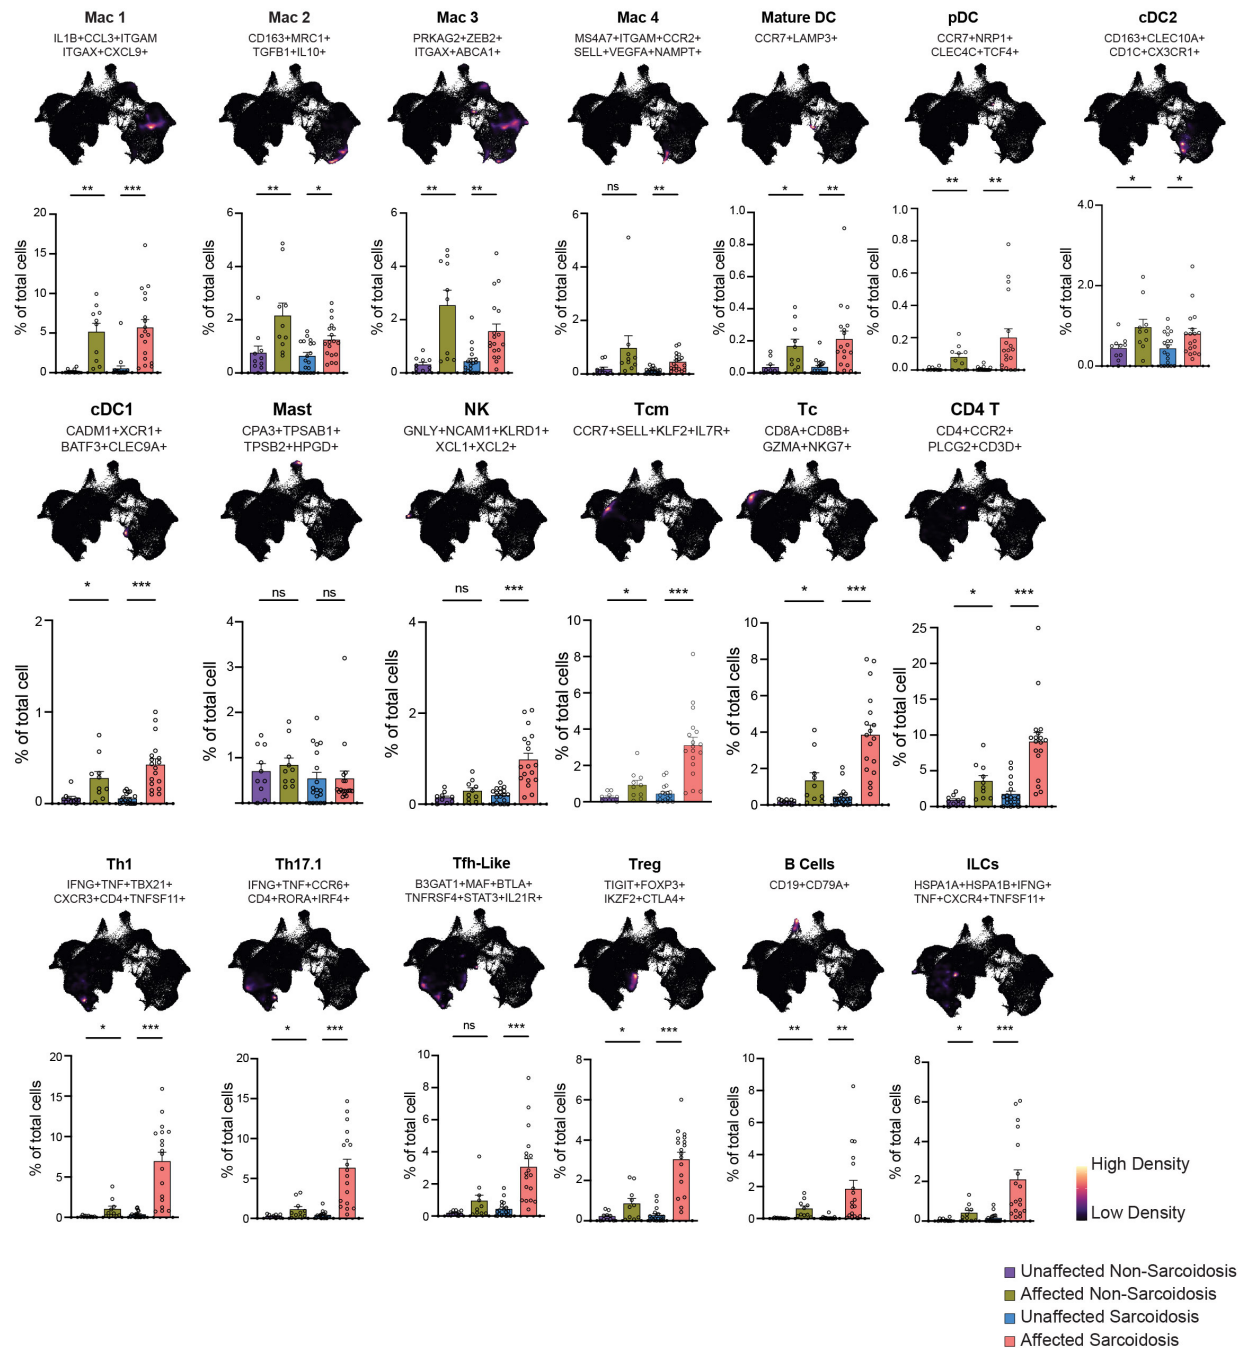

**Figure S3: Individual immune cell populations in sarcoidosis and non-sarcoidosis skin granulomas.**

Analysis of individual cell types with marker genes indicated below the title. Density plot demonstrates location of subgroup within UMAP. Bar plot shows relative contribution as % of total cells. DC, dendritic cell; pDC, plasmacytoid dendritic cell; cDC, classical dendritic cell; Mac, macrophage; Tc, cytotoxic T cell; Tcm, T central memory cell. Data depicted as mean  $\pm$  SEM. Statistical significance was calculated using the two-tailed paired Student's t-test. \* $p < 0.05$ ; \*\*  $p < 0.01$ ; \*\*\*  $p < 0.001$ .

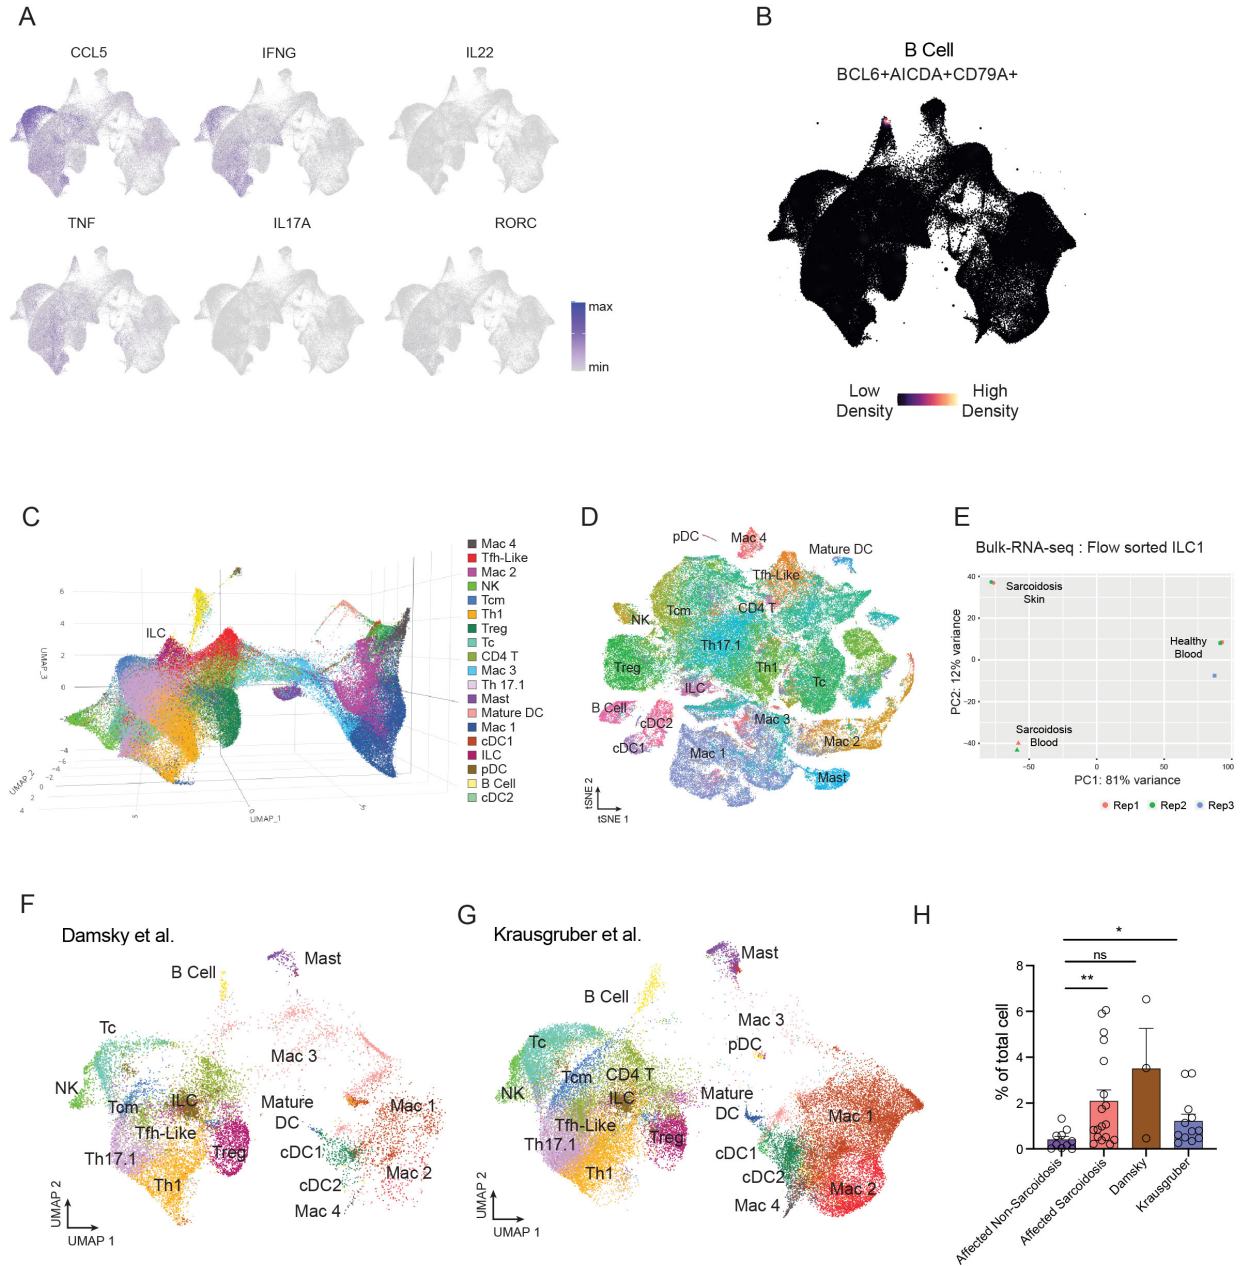

**Figure S4: Sarcoidosis granulomas exhibit increased levels of ILC1s.**

(A) Expression levels of individual cytokines within sarcoidosis UMAP. (B) Density plot demonstrates location of B cells expressing maturation markers *BCL6* and *AICDA* within UMAP. (C) 3D UMAP plot depicting subclustering of immune cells. ILCs are highlighted as a unique population. (D) tSNE plot depicting subclustering of immune cells. (E) Principle components analysis (PCA) of bulk RNA-seq samples of purified ILC1s from sarcoidosis skin, sarcoidosis blood, and healthy blood demonstrating separation between healthy and sarcoidosis samples. (F, G) UMAP plots of sarcoidosis affected skin from previously published datasets. (H) Bar plot shows ILC levels as % of total cells in these datasets. Statistical significance was calculated using the two-tailed unpaired Student's t-test. \* $p < 0.05$ ; \*\*  $p < 0.01$ .

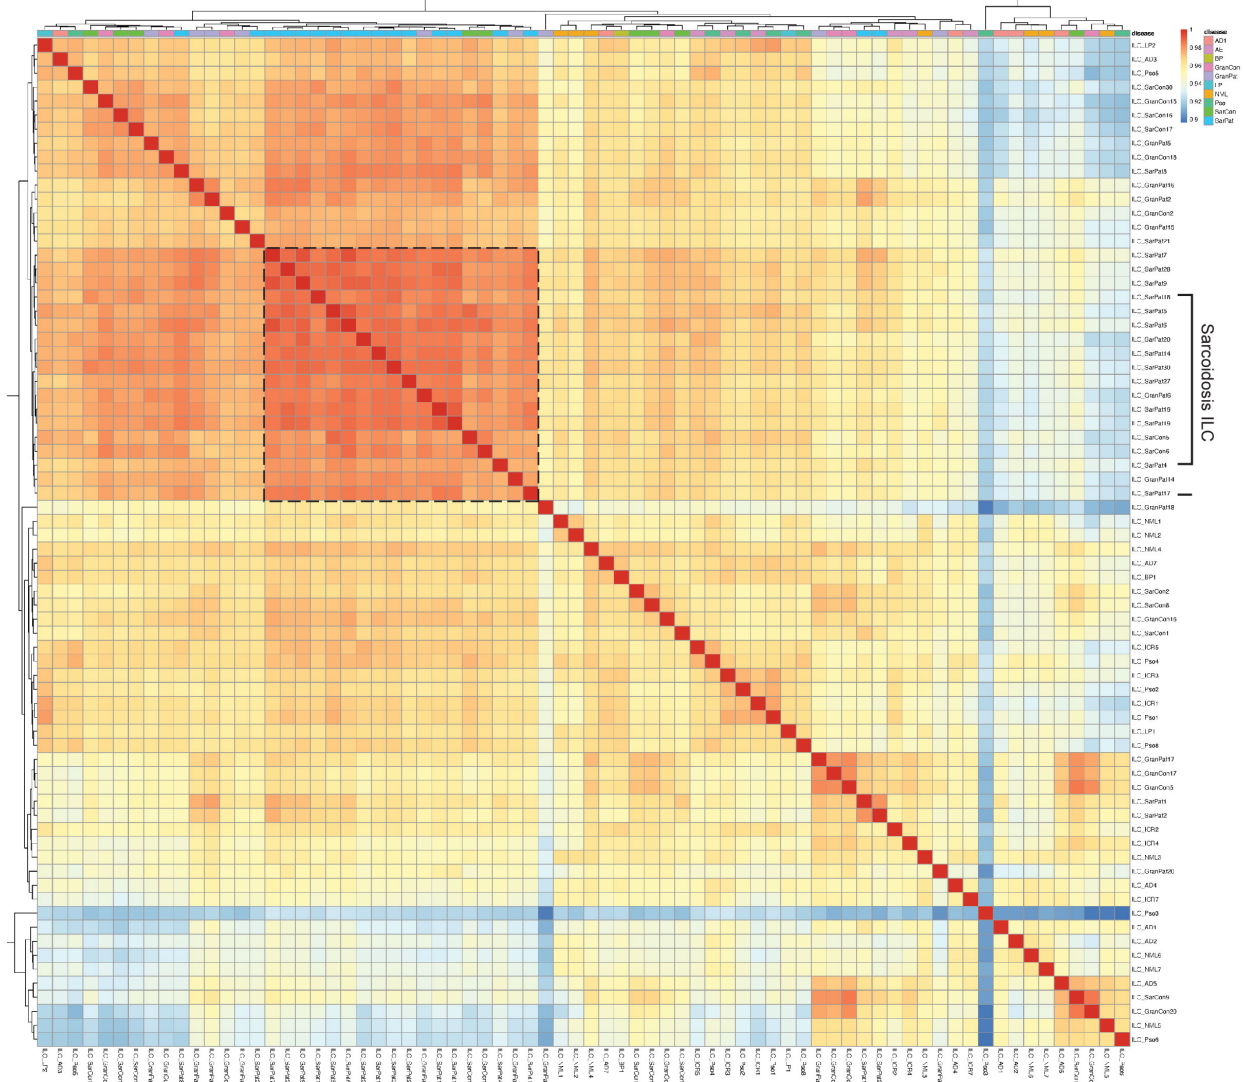

**Figure S5: ILCs from sarcoidosis exhibit a unique activation pattern compared to ILCs from other dermatologic diseases.** Comparison of gene activation pattern of ILCs across different dermatologic diseases and sarcoidosis (26).

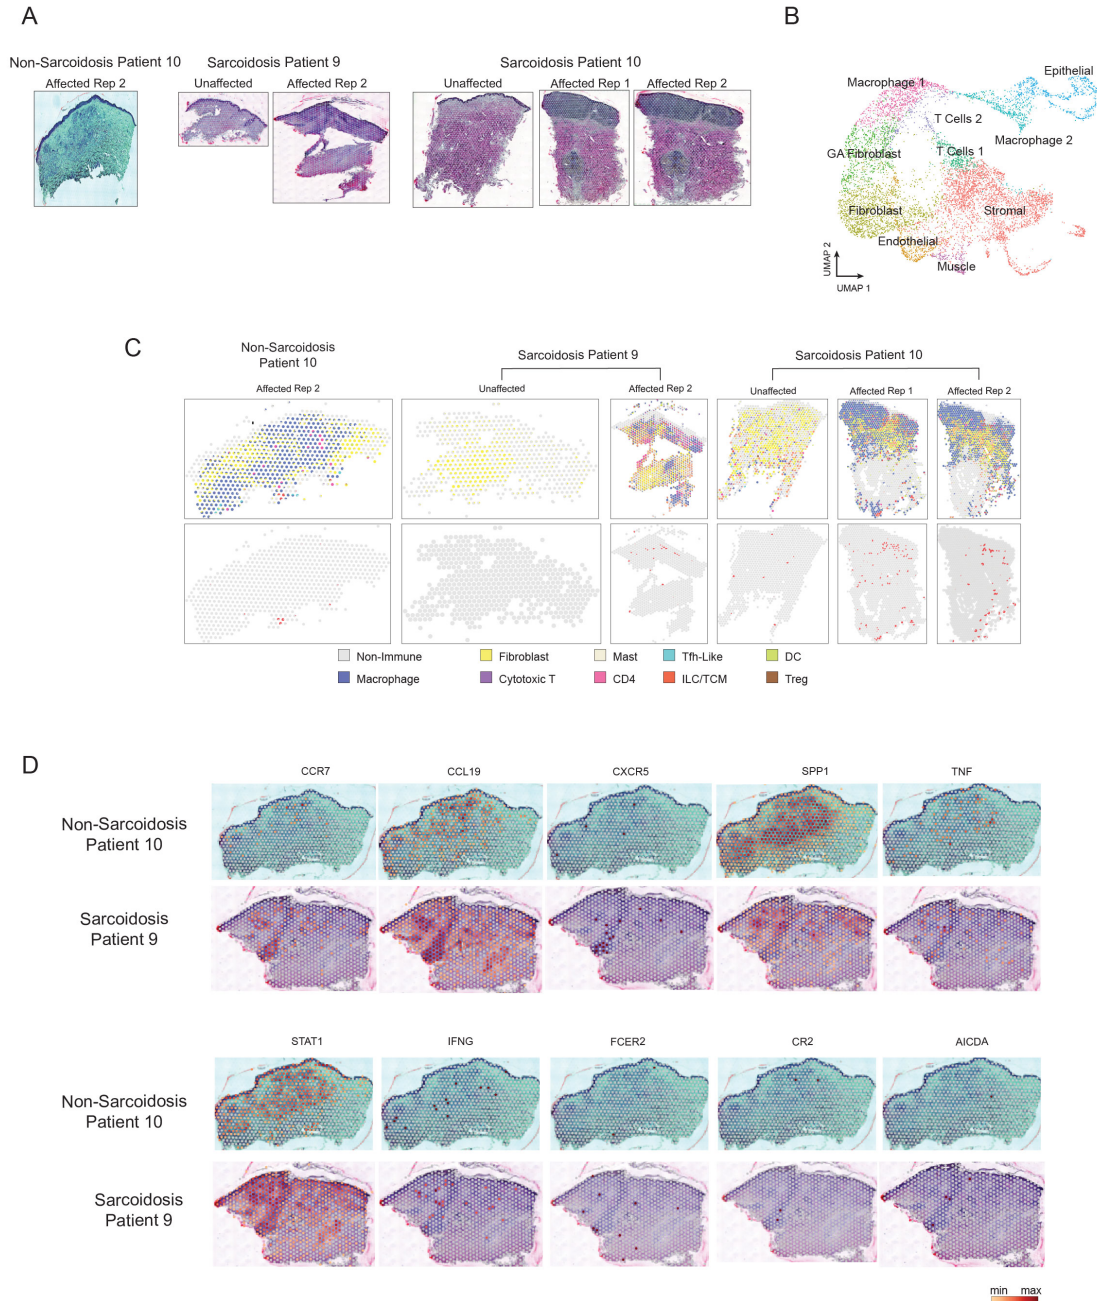

**Figure S6: Spatial transcriptomics of skin granulomas.**

(A) Representative H&E images of non-sarcoidosis and sarcoidosis patient skin granulomas. (B) UMAP depicting immune cell subclustering. (C) Deconvoluted cell type identification from spatial transcriptomics of sarcoidosis and non-sarcoidosis granuloma patients. Each spot is represented as a pie chart displaying relative cell proportions. Top panels highlight individual immune cell populations and bottom panels highlight ILCs specifically. (D) Expression of individual genes in sarcoidosis and non-sarcoidosis spatial transcriptomics.

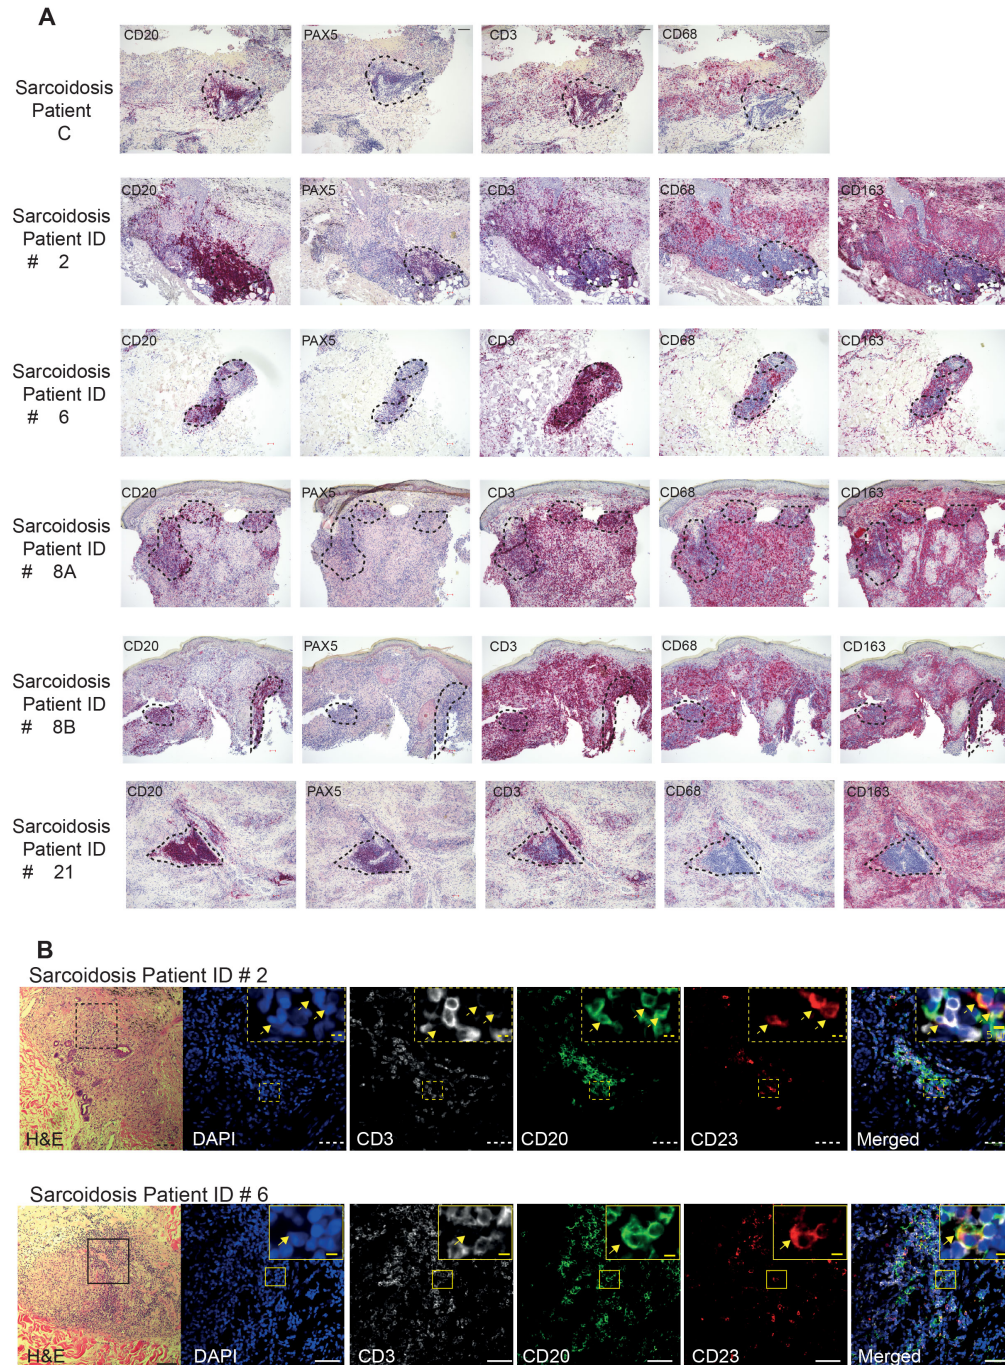

**Figure S7: Sarcoidosis granulomas contain tertiary lymphoid structures.**

(A) Immunohistochemistry depicting localization of B cells (CD20, Pax5), T cells (CD3), and macrophages (CD68, CD163) in sarcoidosis affected skin. Dotted box outlines granuloma. Scale bars: 100  $\mu$ m. (B) Representative H&E and immunofluorescence images depicting localization of TLS (CD3<sup>-</sup>, CD20<sup>+</sup>, CD23<sup>+</sup>, yellow arrows). Scale bars: 100  $\mu$ m, Scalebar in yellow inset 5  $\mu$ m.

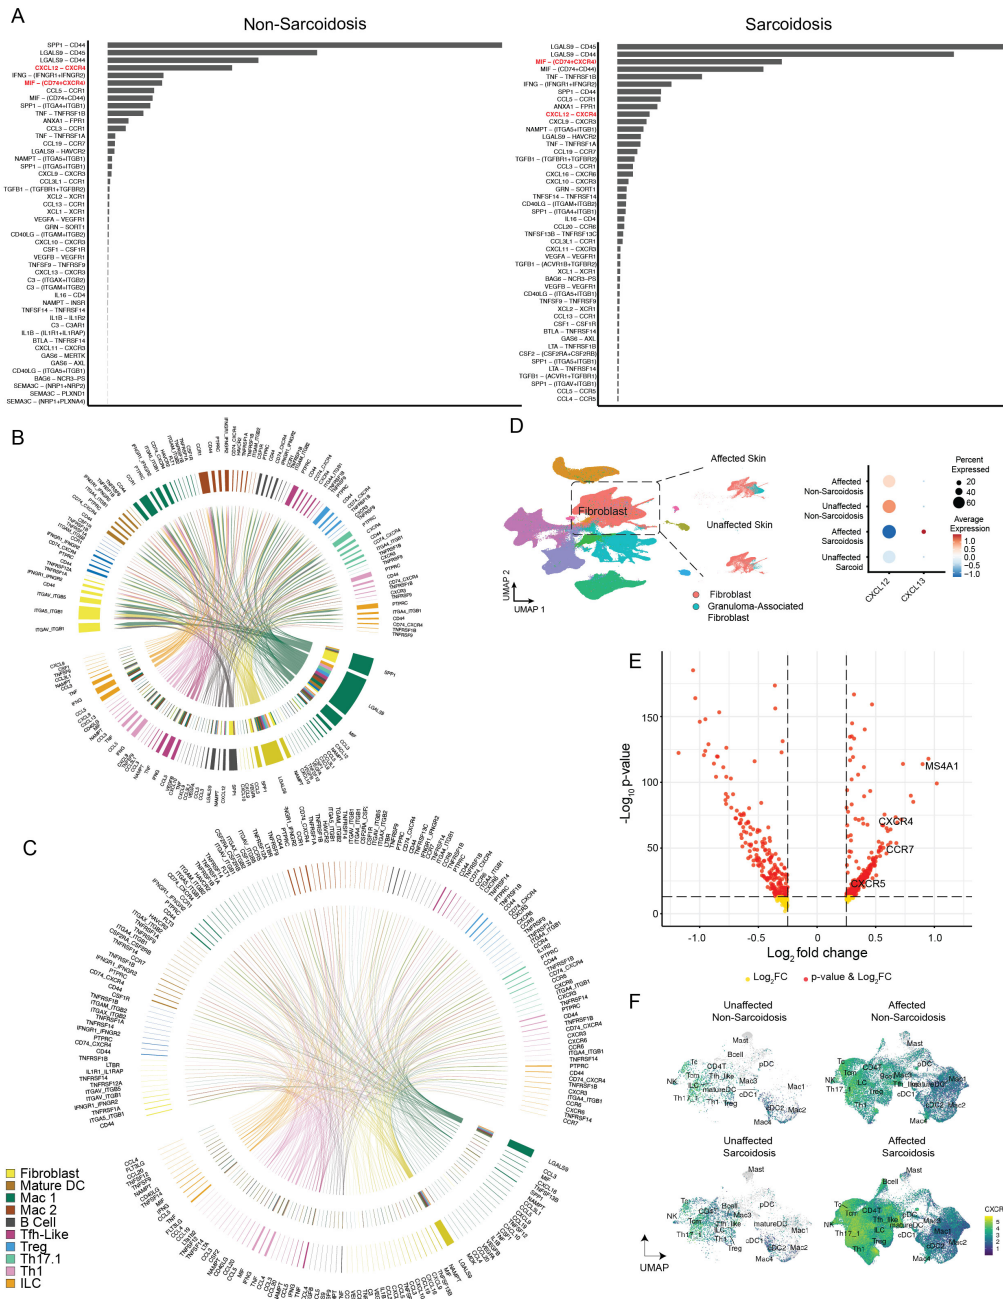

**Figure S8: Sarcoidosis granulomas exhibit unique signaling changes compared to non-sarcoidosis skin granulomas.**

(A) Global ligand-receptor analysis in non-sarcoidosis and sarcoidosis granulomas. (B-C) Cell-specific ligand-receptor analysis for non-sarcoidosis (B) and sarcoidosis (C) granulomas. Bottom half of the circular represents secreting cell types. Top half of the circle depicts receiving cell types. The inner bottom-half circle summarizes the receiving cell types by color. (D) Analysis of a specific subpopulation of fibroblasts in skin granulomas; sarcoidosis-associated populations specifically express CXCL13. (E) Differential gene expression of B cells in sarcoidosis affected skin highlights expression of CXCR5. (F) UMAP depicting expression levels of CXCR4 in sarcoidosis and non-sarcoidosis skin. Color depicts expression level.



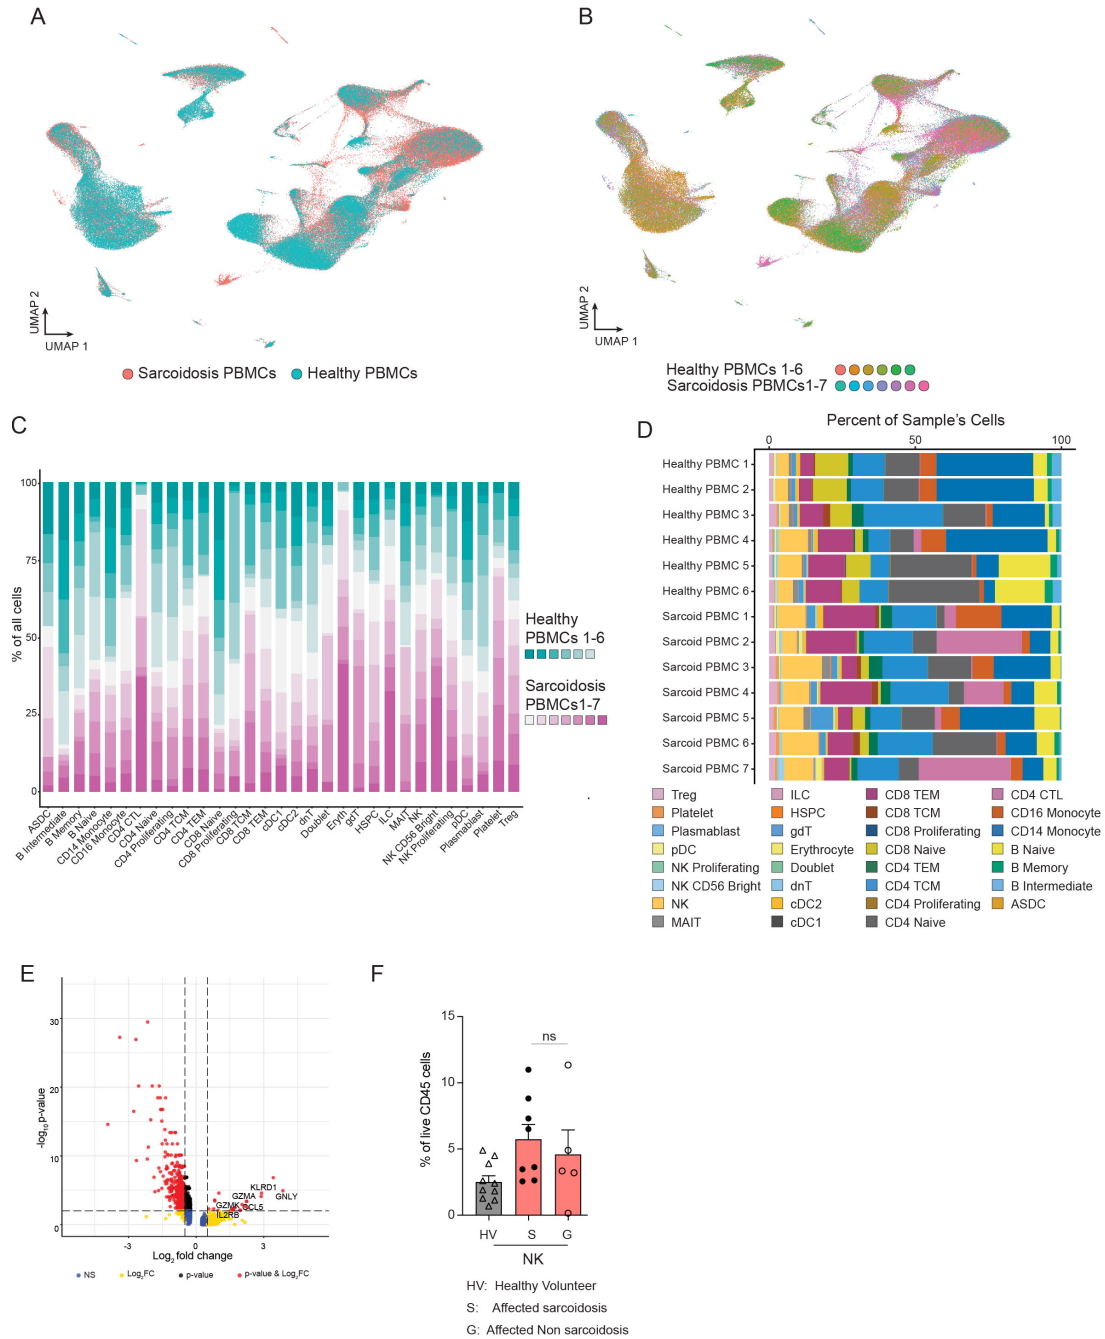

**Figure S9: Sarcoidosis patients have increased circulating ILC1s.**

(A) UMAP plots of PBMCs from healthy and sarcoidosis patients (N=6). (B) Cells from individual patients are annotated. (C) Bar plot showing relative contributions of different cell types in PBMCs. (D) Bar plot showing relative contribution of different cell types in individual samples. (E) Volcano plot of differential gene expression in ILCs from healthy and sarcoidosis PBMC samples. (F) NK cells levels in blood of healthy volunteers (HV), sarcoidosis patients (S) and non-sarcoidosis patients (G). Plotted as percentage of live CD45+ cells. Statistical significance was calculated using the two-tailed unpaired Student's t-test. ns, non-significant.

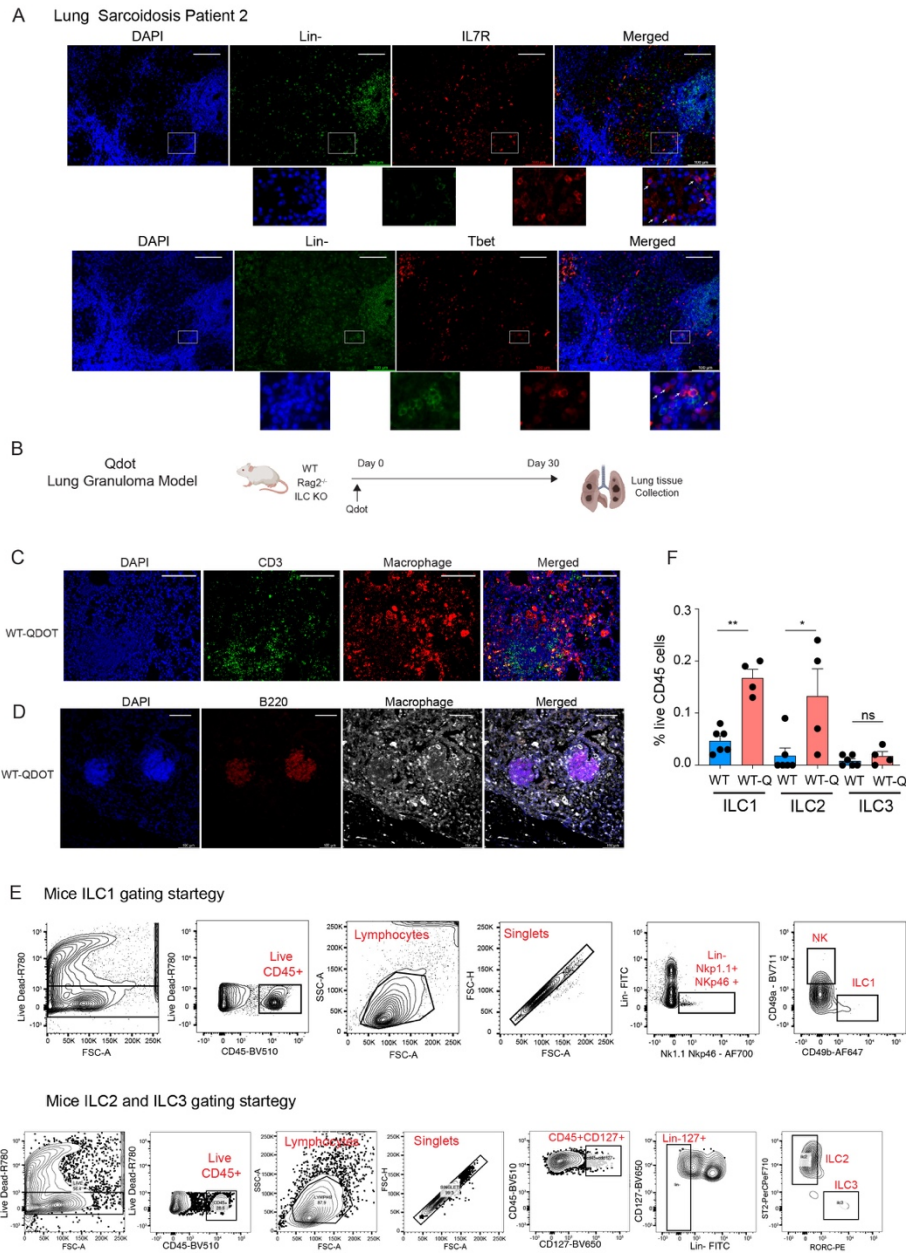

**Figure S10: Lung sarcoidosis granulomas and mouse pulmonary granulomas recruit ILCs.**

(A) Representative histology demonstrating ILCs (Lin<sup>-</sup>, IL7R<sup>+</sup>, Tbet<sup>+</sup>) and recruitment of B cells (CD20<sup>+</sup>, CD23<sup>+</sup>) to human lung sarcoidosis granulomas. Lineage negative (CD3, CD16, CD19, CD20, CD56, CD68 labelled in green). Scale bars 100  $\mu$ m. (B) Schematic of cadmium nanoparticle (Qdot) mouse model. (C-D) Representative immunofluorescence depicting macrophage (F4/80<sup>+</sup>), T cell (CD3<sup>+</sup>), and B cell (B220<sup>+</sup>) accumulation in lung tissue from QDOT-treated mice. The wildtype F4/80<sup>+</sup> macrophages are also shown in Figure 6D. Scale bars: 100  $\mu$ m. (E) Flow cytometry gating scheme for mouse ILCs and NK cells. (F) ILC levels in WT mice (n=6) and QDOT-treated WT mice (n=4). Plotted as percentage of live CD45<sup>+</sup> cells. Statistical significance was calculated using the two-tailed unpaired Student's t-test. ns, non-significant. \*p<0.05; \*\* p< 0.01.

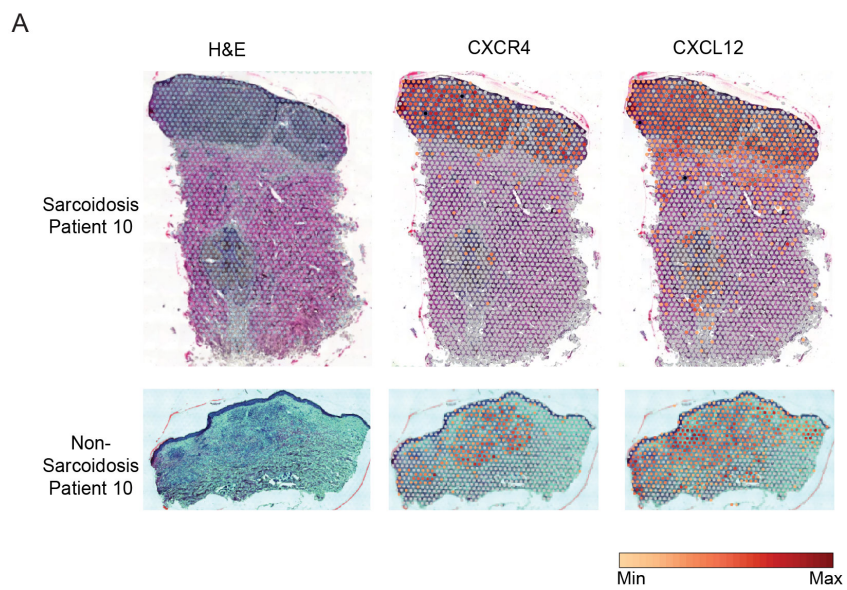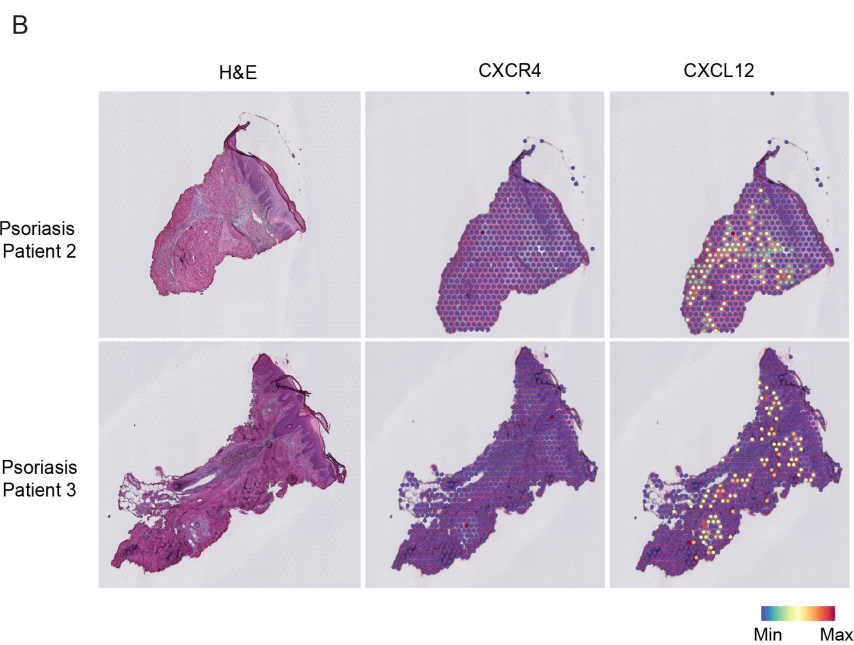

**Figure S11: Sarcoidosis specifically induces CXCR4-CXCL12 signaling.**

(A, B) Spatial transcriptomics depicting CXCR4 and CXCL12 expression in sarcoidosis-affected skin (Patient 10), non-sarcoidosis-affected skin (Patient 10), and psoriasis skin (patient 2, patient 3).
